1 **Title:** Direct control of shell regeneration by the mantle tissue in the pearl oyster *Pinctada*  
2 *fucata* via accelerating CaCO<sub>3</sub> nucleation

3  
4 **Author names and affiliations**

5 Jingliang Huang<sup>a</sup>, Yangjia Liu<sup>a</sup>, Taifeng Jiang<sup>a</sup>, Wentao Dong<sup>a</sup>, Guilian Zheng<sup>a</sup>, Liping Xie<sup>a</sup>,  
6 Rongqing Zhang<sup>ab\*</sup>

7 <sup>a</sup> Protein Science Laboratory of the Ministry of Education, School of Life Sciences, Tsinghua  
8 University, Beijing 100084 China

9 <sup>b</sup> Department of Biotechnology and Biomedicine, Yangtze Delta Region Institute of Tsinghua  
10 University, Jiaxing, Zhejiang Province, 314006, China

11  
12 **Corresponding authors**

13 \* Corresponding author.

14 Tel.: +86 10 62776230; fax: +86 10 62772899. E-mail address: rqzhang@mail.tsinghua.edu.cn  
15 (R. Zhang).

16  
17  
18  
19  
20  
21  
22  
23  
24  
25  
26  
27  
28 **Abstract**

29 Molluscan bivalves rapidly repair the damaged shells to prevent further injury. However, it  
30 remains unclear how this process is precisely controlled. In this study, we applied scanning  
31 electronic microscopy, transmission electronic microscopy and histochemical analysis to  
32 examine the detailed shell regeneration process of the pearl oyster *Pinctada fucata*. It was found  
33 that the shell damage caused the mantle tissue to retract, which resulted in dislocation of the  
34 mantle zones to their correspondingly secreted shell layers. However, the secretory repertoires  
35 of the different mantle zones remained unchanged. As a result, the dislocation of the mantle  
36 tissue dramatically affected the shell morphology, and the unusual presence of the submarginal  
37 zone on the nacreous layers caused de novo precipitation of prismatic layers on the nacreous  
38 layers. Real-time PCR revealed that the expression of the shell matrix proteins (SMPs) were  
39 significantly upregulated, which was confirmed by the thermal gravimetric analysis (TGA) of  
40 the newly formed shell. The increased matrix secretion accelerated CaCO<sub>3</sub> nucleation thus  
41 promoting shell deposition. Taken together, our study revealed the close relationship between  
42 the physiological activities of the mantle tissue and the morphological change of the  
43 regenerated shells.

44 **Keywords:** *Pinctada fucata*, shell regeneration, microstructure, nucleation, organic matrix

## 45 **1. Introduction**

46 Organisms are capable of depositing a diverse array of minerals, which fulfill important  
47 biological functions. One of such functions is to protect the body from predator attack.  
48 Accordingly, the predators strengthen their weapons (teeth and claws). The arms race between  
49 the predators and the preys drives the evolution of remarkable skills for survival and results in  
50 the extraordinary biominerals with outstanding mechanical properties, such as limpet teeth  
51 (Mann et al., 1986), sea urchin spines (Seto et al., 2012), crustacean exoskeletons (Chen et al.,  
52 2008; Raabe et al., 2005), and molluscan shells (Song et al., 2003). Among these, molluscan  
53 shells have been extensively studied due to their hardness and toughness, which make them as  
54 ideal models for bioinspired ceramics (Finnemore et al., 2012; Jackson et al., 1988).

55 The molluscan shells can be rapidly repaired when external aggressions occur, which endows  
56 the molluscs undeniable evolutionary advantage. Shell regeneration induced by artificial  
57 damage is widely adopted to reveal the shell formation process, because the regenerated shells  
58 resembled the normal shells and the repair process was similar to normal shell deposition (Chen  
59 et al., 2019; Huning et al., 2016b; Meenakshi et al., 1974). Usually, shell regeneration begins  
60 with deposition of an organic membrane (Chen et al., 2019; Pan and Watabe, 1989), serving as  
61 the temporary barrier and the first substrate for the mineral phase deposition. Although the shell  
62 regeneration is conducted by the shell secreting mantle, the morphology of the repaired shells  
63 may slightly differ from the normal shells, as found in the green ormer *Haliotis tuberculata*  
64 (Fleury et al., 2008) and the mussel *Mytilus edulis* (V. R. Meenakshi, 1973). Such discrepancy  
65 may due to the stress response of the mantle tissue. Indeed, our recent study showed that, in the  
66 pearl oyster *Pinctada fucata*, Peroxidase-like protein and  $\beta$ -N-acetylhexosaminidase were  
67 exclusively expressed during the shell repair process (Chen et al., 2019) and might be involved  
68 in the initiation of the prismatic layer formation. However, it remains unknown how the mantle  
69 tissue response to the shell damage stimulation and how its physiological changes affect the  
70 shell morphology.

71 The pearl oyster *P. fucata* have been extensively studied in the biomineralization field. The  
72 shell of *P. fucata* consists of inner nacreous layers and outer prismatic layers. The nacreous  
73 layers are hundreds of layers of aragonitic tablets separated by organic matrix, resembling the  
74 brick-mortar walls. The prismatic layers contain dozens of layers of longitudinally-arranged  
75 columnar calcite. Each prismatic layer is coated by a periostracum membrane on the outer  
76 surface. The formation of the shell has been ascribed to the matrix secreting mantle tissue  
77 (Marie et al., 2012; Zhang and Zhang, 2006). The mantle tissue can be divided into three regions  
78 according to their different secretory repertoires: mantle edge, submarginal zone, pallial and  
79 central zones (Fang et al., 2008). The mantle edge is responsible for the periostracum formation  
80 and initial stage of the prismatic layer deposition (Suzuki, 2013). The submarginal zone further  
81 thickens the prismatic layer, while the nacreous layers are secreted by the pallial and central  
82 zones of the mantle tissue (Marie et al., 2012). The shell formation process is precisely  
83 controlled by the mantle tissue.

84 In this study, we are seeking to understand the whole process of the shell regeneration after  
85 shell damage. Scanning electron microscopy (SEM), transmission electronic microscopy  
86 (TEM), thermal gravimetric analysis (TGA), histochemical analysis and real-time PCR were  
87 used to examine both the regenerated shells and the covering mantle tissue. The results showed  
88 that the nucleation of  $\text{CaCO}_3$  was promoted by upregulating the SMPs secretion in the mantle

89 tissue.

## 90 2. Materials and methods

### 91 2.1 Oyster collection and cultivation

92 The pearl oyster *Pinctada fucata* was obtained from Guangdong Ocean University  
93 (Zhangjiang, China) and air transported to Beijing. The oysters were acclimated for one week  
94 in an aquarium tank containing 700 L artificial sea water (salinity  $33.0 \pm 0.5$  psu, pH  $8.1 \pm 0.05$ )  
95 at room temperature. The oysters were fed twice a week with commercial *Spirulina* before and  
96 during the experiment.

97

98 Table 1. Primers for real-time PCR in this study.

|                   |                                   |
|-------------------|-----------------------------------|
| GAPDH-RT-F        | 5' GCC GAG TAT GTG GTA GAA TC 3'  |
| GAPDH-RT-R        | 5' CAC TGT TTT CTG GGT AGC TG 3'  |
| Nacrein-RT-F      | 5' GGCTTTGGCGACGAACCGGA 3'        |
| Nacrein-RT-R      | 5' ACACGGGGGAGTGGTCAGGG 3'        |
| Prisilkin 39-RT-F | 5' ATGCGTTCAGGGTATAGTTATTACAGC 3' |
| Prisilkin 39-RT-R | 5' TACTACCAGAACTGTAATATGATGG 3'   |
| Pif80-RT-F        | 5' GTCCAGGATTCGATGCACTGAA 3'      |
| Pif80-RT-R        | 5' CGGAACTGATCCATATCCTACACC 3'    |
| Prismalin 14-RT-F | 5' TGGGTATGGCGGATTTAACGGTG 3'     |
| Prismalin 14-RT-R | 5' AATCCGCCATCATCGTCACCAAA 3'     |
| N16-RT-F          | 5' TGCGGACGTTACTCATACTGCT 3'      |
| N16-RT-R          | 5' TTGTCATCATCGGTGTAACAGCA 3'     |
| Aspein-RT-F       | 5' TACTTTCCCAGTGGCTGACC 3'        |
| Aspein-RT-R       | 5' CATCACTGGGCTCCGATACT 3'        |
| KRMP3-RT-F        | 5' GATTGGAGTCCTTAGCGTTC 3'        |
| KRMP3-RT-R        | 5' GTAACATAGCTTCTGACAATTCC 3'     |
| MSI60-RT-F        | 5' GAGCCTCTGCAAAAGCCTCTGCTA 3'    |
| MSI60-RT-R        | 5' CAGATGCTGAAGCAGATGCTGAGC 3'    |

99

### 100 2.2 Artificial shell damage-induced shell regeneration

101 Totally 80 healthy individuals with dorsal-ventral shell length of 6-7 cm were randomly selected  
102 for experiment. A “V” nick on the shell was made by cutting the ventral edge with a scissors  
103 (Figure 1). The cut shell pieces were examined to make sure that the inner nacreous layers were  
104 injured. The oysters were then returned to the tank and collected at 6 hours (h), 12 h, 24 h, 48  
105 h, 7 days (d), 30 d and 60 d after the treatment. At each time point, six individuals were  
106 anaesthetized by soaking the oysters in 1000 mL sea water containing 0.25 % phenoxy propyl  
107 alcohol for 10 min. Six untreated oysters were used as a control group. Then the oysters were  
108 fixed with 4 % formaldehyde in sea water for 24 h.

### 109 2.3 Scanning electron microscopy (SEM) analysis

110 After removing the covering mantle tissue, the shell samples containing the “V” nick and the  
111 adjacent area were cut by a scissors and a glass cutter. The small shell pieces were coated with  
112 gold and examined by a scanning electron microscope (SEM, FEI Quanta 200, Germany) with  
113 an accelerating voltage of 30 kV in a high vacuum mode.

### 114 2.4 Decalcification of the shell and histochemical analysis

115 The regenerated shells were cut by a scissors after removing the mantle tissue and used for  
116 subsequent decalcification. Specifically, we prepared the mantle-shell sample with mantle  
117 remained attaching to the shell inner surface. To obtain such samples, the adductor muscle was  
118 cut by a scalper after the fixation mentioned above, and then the mantle covering the injury was  
119 carefully separated from the gill and the adjacent mantle region by a razor blade not to make  
120 any displacement of the mantle-shell. The inblock was cut by a scissors and a glass cutter. All  
121 the shell samples were completely decalcified with 0.5 M EDTA and rinsed three time in sterile  
122 water. The decalcified samples were paraffin-embedded after a gradient ethanol dehydration. A  
123 routine histochemical procedure of H&E stain was subsequently applied and an Olympus IX81  
124 light microscope was use to photograph the slices.

#### 125 2.5 Thermal gravimetric analysis (TGA)

126 The regenerated shells from 30 oysters of 60 days after shell damage were collected by nipper  
127 and merged. These samples were mainly prismatic layers. As a control, prismatic shell layers  
128 from 10 normal individuals were collected and merged. The shell samples were ultrasonic  
129 washing in ddH<sub>2</sub>O three times and air dried. The content of the organic compounds in the shells  
130 was measured by TGA (TherMax, Cahn Instruments, China) in a nitrogen atmosphere. The  
131 heating temperature ranged from room temperature to 900 °C at a rate of 10 °C per min.

#### 132 2.6 RNA extraction

133 To separately extract RNA from the mantle edge and pallial zone, the treated and untreated  
134 oysters were immersed in one litter sea water containing 0.25 % phenoxy propyl alcohol for 10  
135 min. After the animal was fully anaesthetized, the adductor muscle was cut by scalpel carefully.  
136 Then the edge and pallial zone of the mantle around the notching site were cut and held in 2 ml  
137 RNase-free Eppendorf tubes. For each time point, tissues from six animals were merged into  
138 one sample. Each sample was added with 1 ml Trizol (Thermo Fisher Scientific, USA) and  
139 stored at -80 °C.

140 For the RNA extraction, two steel balls (pretreated at 180 °C for four hours to denature any  
141 RNase) were added to each sample tube after unfreezing the tissues. A tissue breaker (TL2010S,  
142 DHS, China) equipped with a high speed shaker was used to grind the mantle tissues, and the  
143 homogenized mixture was transferred to a new tube. Then 200 µL chloroform was added to  
144 denature the protein components. The mixtures were vortexed and centrifuged at 12000 g 4 °C  
145 for 15 min. The supernatants (~600 µL) were transferred to new tubes and added with 150 µL  
146 chloroform. The mixtures were vortexed again and centrifuged at 12000 g 4 °C for 15 min. The  
147 supernatants were transferred to new tubes and mixed with isopropyl alcohol of equal volume.  
148 The solutions were gently mixed and kept at -20 °C for 10 min. Then a centrifugation (12000  
149 g, 4 °C, 15 min) was applied, and the supernatants were discarded. The RNA pellets were rinsed  
150 with 1 ml 75 % alcohol for once and air dried in a clean bench. The RNAs were dissolved in  
151 40 µL RNase-free water. The quality and concentration of the RNAs were examined by  
152 Nanodrop 2000 (Thermo Scientific, USA).

#### 153 2.7 Reverse transcription and real-time PCR

154 PrimeScript™ RT Master Mix (TaKaRa, Shiga, Japan) was used to reverse transcribe the RNA  
155 into cDNA. And real-time PCR analysis of the gene expressions were performed according to  
156 our previous study (Huang et al., 2018) using SYBR® Premix Ex Taq™ product (TaKaRa,  
157 Shiga, Japan) in a StepOnePlus™ Real-Time PCR System (Applied Biosystems, Vernon, CA,  
158 USA). Gyceraldehyde-3-phosphate dehydrogenase (GAPDH) was used as an internal reference,

159 and the primers for the shell matrix proteins are listed in Table 1. The relative gene expression  
160 levels were calculated by the  $-\Delta\Delta\text{CT}$  method.  
161

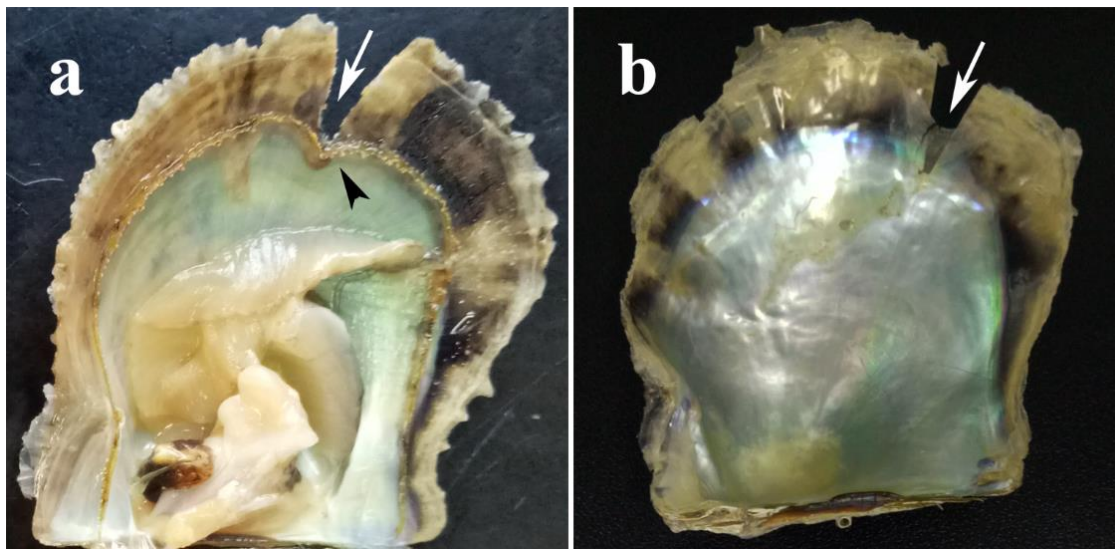

162

163 Figure 1. Artificial shell damage in *Pinctada fucata*. a, formaldehyde-fixed oyster sample with  
164 the left valve removed, 48 hours after shell damage. Note that the mantle tissue retracted into  
165 the pallial zone (black arrow head) at the notching site (white arrow). b, shell sample of 30 days  
166 after shell damage showing the thin regenerated shell layer covering the notching site (white  
167 arrow).

168

### 169 3. Results and Discussion

#### 170 3.1 The general shell regeneration process

171 We performed a long term study of the shell regeneration in the pearl oyster *Pinctada fucata*.  
172 No mortality due to the shell damage was observed up to 60 days, and all the oysters exhibited  
173 shell regeneration to varied extent. The mantle edge retracted into the pallial zone soon after  
174 the notching treatment and remained staying behind the cut edge (Figure 1a). As the repair  
175 progress, a transparent shell sheet began to grow right upon the injured site (Figure 1b), which  
176 could be seen as early as 7 days, consistent with previous studies (Chen et al., 2019; Huning et  
177 al., 2016a), until the nick was progressively covered by newly formed shell layers. The mantle  
178 edge surrounding the nick also displayed a “V” shape arrangement, indicating that the outer  
179 epithelium is capable to recognize the physical condition of the shell surface, although the  
180 manner by which is not clear.

181

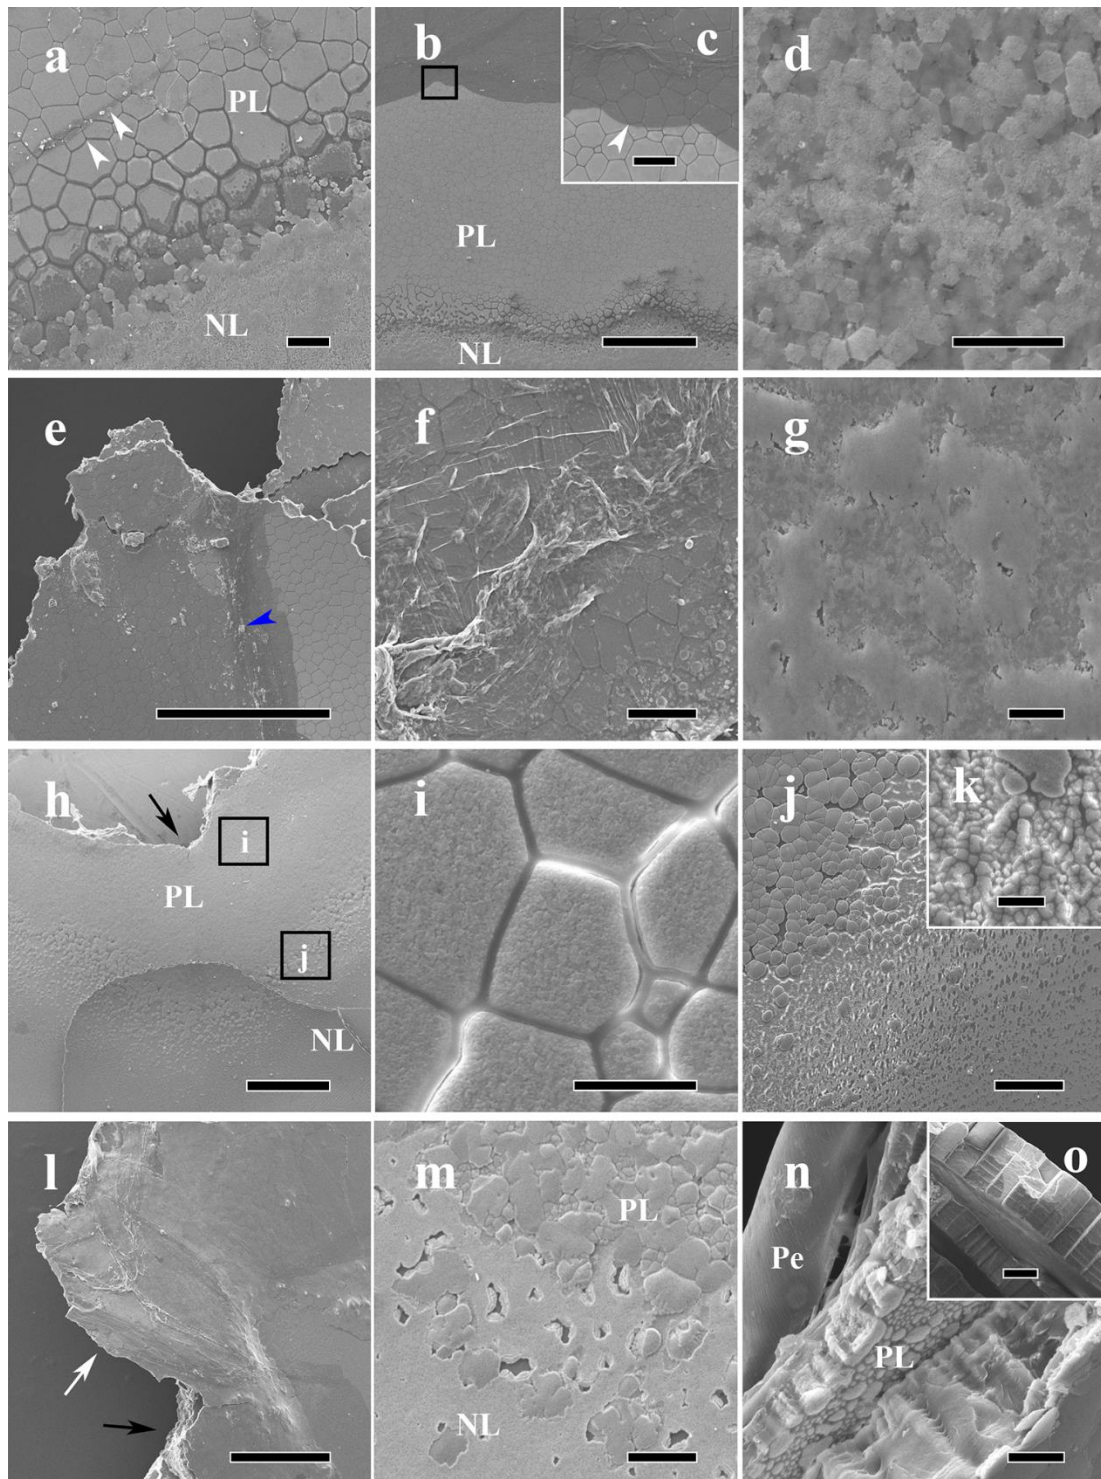

182

183 Figure 2. SEM observation of the regenerated shells. a, 6 hours after shell damage, transparent  
184 organic membrane (periostracum) was visible near the notching site (white arrow heads). b-d,  
185 12 hours after shell damage, showing that the adjacent prismatic layer was covered by an  
186 periostracum membrane (arrow head in c) and the nacreous layer deposition was affected (d).  
187 c is the magnification of the black frame in b. e, 24 hours after shell damage, CaCO<sub>3</sub> depositions  
188 were visible within the covering periostracum membrane (blue arrow head). The notching site  
189 is at the top left. f and g, 48 hours after shell damage. The periostracum membrane was  
190 thickened and more particles were deposited in the membrane in the adjacent prismatic layer

191 (f) and nacre tablets were no longer visible in the adjacent nacreous layer (g). h-k, 7 days after  
192 shell damage. i and j are the magnifications of the two black frames in h, showing the newly  
193 formed prism polygons (i) near the notching site (black arrow) and the atypical prism/nacre  
194 transition zone (j). k is the magnification of j. l, 30 days after shell damage, the previous  
195 prismatic layer (black arrow) was covered by a thin regenerated prismatic layer (white arrow).  
196 m and n, 60 days after shell damage, showing the recovering prismatic and nacreous layers. n  
197 is the side view of the regenerated prism layers. o, side view of normal prism layers. PL,  
198 prismatic layer; NL, nacreous layer; Pe, periostracum. Scale bars in b, e, h and l are 500  $\mu\text{m}$ ;  
199 scale bars in a, c, f, j, m and o are 50  $\mu\text{m}$ ; scale bars in d, g, i, k and n are 10  $\mu\text{m}$ .

200

201 The regeneration was quite rapid. At 6 hours after the shell damage, thin organic membrane  
202 was evidenced near the nick (Figure 2a) and supposed to be the periostracum which is the  
203 initiation of prismatic layer deposition (Suzuki, 2013). Another important role of the  
204 periostracum was to set up a barrier to enclose the extrapallial space from the ambient sea water.  
205 The periostracum was continued to be secreted and expanded in the following hours (Figure 2b  
206 and 2c). Simultaneously, the microstructure of the adjacent nacreous layer was affected (Figure  
207 2d). The retracted mantle edge and submarginal zone might disturbed the normal nacre  
208 deposition. Alternatively, the dissolution of hexagonal aragonitic tablets might be due to the  
209 hypoxia (Melzner et al., 2011; Silverman et al., 1983), caused by the close of the shell valves  
210 during the first few hours post shell damage. Numerous particles were found within the  
211 periostracum at 24 h (Figure 2e) and began to grow as the periostracum continue to be secreted  
212 at 48 h (Figure 2f). Suzuki et al. (Suzuki, 2013) showed that the initial growth of the prism  
213 column begins with the nucleation of calcium carbonate in the periostracum. Consistently, in  
214 the early stage of shell regeneration, periostracum was first laid down on the previous shell  
215 layers following by the deposition of calcium carbonate particles which would further grow  
216 into prism. The nacreous layers were covered by disordered crystals with a relatively smooth  
217 and flat morphology at 48 h (Figure 2g). At 7 d after shell damage, a newly formed shell layer  
218 was visible around the nick (Figure 2h) and was found to be prism (Figure 2i). The inner surface  
219 of the prism was rough and composed of nanograins, in accordance with our previous study  
220 (Chen et al., 2019). At the dorsal side of the regenerated shell layer, an atypical prism/nacre  
221 transition zone was observed (Figure 2j). In normal condition, nacreous layers grow and spread  
222 upon the inner surface of the mature prismatic layers, as seen in Figure 2a. However, at the  
223 early stage of shell regeneration, precipitation of nacre tablets was interrupted at the injury site  
224 and replaced by prism deposition. The temporal transition zone was composed of grains of  
225 several microns (Figure 2k). As the repair proceeds, the regenerated prism covered and bridged  
226 the dorsal part of the nick at 30 d (Figure 1b and Figure 2l). In some individuals, the nicks were  
227 completely covered and the regenerated shells were comparable to the shells before damage in  
228 length at 60 d. However, the microstructure of the regenerated prismatic layers (RPL) (Figure  
229 2m and 2n) was quite different from the that of the normal ones (Figure 2a and 2o), suggesting  
230 that the shell regeneration process is a long time event. As shown in Figure 2n, the RPL layer  
231 was deposited right on the periostracum, following by a secondary prism. The primary prism  
232 contained prolonged granules of several microns in diameter, which were not well shaped and  
233 embedded in the organic matrix. The secondary prism appeared to be more developed with the  
234 prism columns were clearly shaped, although the diameters (around 10 microns) were

235 significantly smaller than those of the normal prisms (around 50 microns, Figure 2o).

236

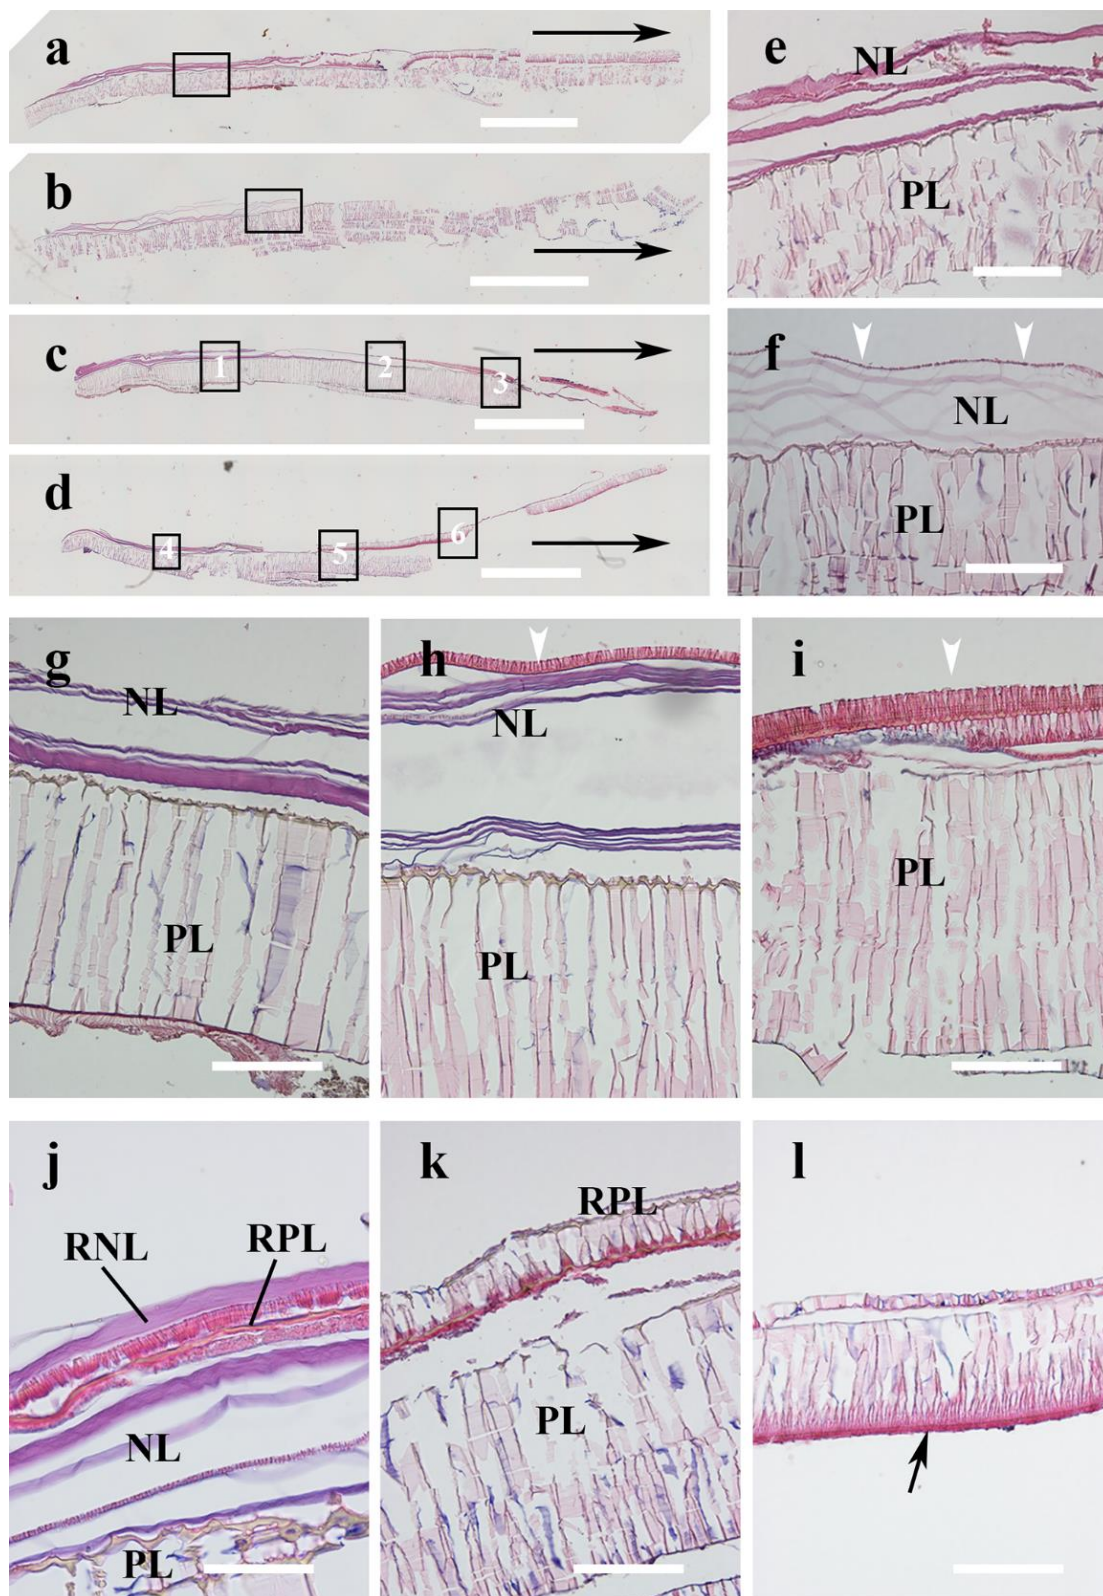

237

238 Figure 3. H&E stain of the decalcified shell samples after shell damage. a-d, panorama view of

239 the decalcified shells of 12 hours, 48 hours, 7 days and 30 days after shell damage, respectively.

240 The long black arrows in a-d indicate the growth direction of the shells. e and f are



241 magnifications of the black frames in a and b, respectively. The white arrow heads indicate the  
242 newly formed periostracum. g-i are magnifications of c, corresponding to black frames 1-3,  
243 respectively. The white arrow heads in h and i indicate the regenerated prismatic layers. j-l are  
244 magnifications of d, corresponding to black frames 4-6, respectively. The black arrow in l  
245 indicates the periostracum membrane. PL, prismatic layer; NL, nacreous layer; RPL,  
246 regenerated prismatic layer; RNL, regenerated nacreous layer. Scale bars in a-d are 1mm; the  
247 others are 100  $\mu\text{m}$  except j (50  $\mu\text{m}$ ).

248

249 To further study the regenerated shells in detail, we decalcified the shell samples and  
250 performed H&E staining. As shown in Figure 3, after removing the  $\text{CaCO}_3$  by EDTA, the  
251 remaining matrix frameworks of the nacre were blue-violet in color, while those of the prism  
252 was purplish red. Interestingly, the framework of the regenerated prismatic layers slightly  
253 differed from the normal prism and were in dark red, indicating that their compositions might  
254 not be exactly the same. Another feature revealed by the histochemical analysis was the peculiar  
255 Sandwich structure of the shell layers, which is consistent with Figure 2h. This phenomenon  
256 could be clearly figured out in Figure 3h and 3j. In such situations, the general prism-nacre  
257 depositing order has been reversed, in other words, the RPL were deposited on the previous  
258 nacre and followed by regenerated nacreous layers (RNL). The RPL deposition began with the  
259 formation of mature periostracum which was seen at 48 h after shell damage (Figure 3b and 3f)  
260 but not in samples of 12 h (Figure 3a and 3e). The slightly differences between the SEM  
261 observation and the H&E stain might be ascribed to the high resolution of the SEM.

### 262 3.2 The nucleation sites of primary prismatic layer

263 As observed in the histochemical analysis, the primary layers of the RPL were composed of  
264 tiny prisms compared with the large prism columns formed in normal conditions (Figure 3h  
265 and 3i), suggesting that nucleation of calcium carbonate in the RPL was dramatically promoted.  
266 Because each prism column can be regarded as one nucleation event of calcium carbonate in  
267 the initiation stage of prismatic layer formation (Ubukata, 2001). Indeed, when we looked into  
268 the outer surface of the regenerated prismatic layers which represent the initial stage of the shell  
269 repair process, the morphology was quite different. At day 7 after shell damage, the primary  
270 layer contained intensive irregular prisms which were crowded and in tower shape (Figure 4b  
271 and 4d). The size was 5-15  $\mu\text{m}$  in diameter, much smaller than the normal prisms (Figure 4a)  
272 which were 30-50  $\mu\text{m}$  in diameter. The number of the tower prisms was around 63.6 per  $10^4$   
273  $\mu\text{m}^2$ , much more than the normal prisms (17.1 per  $10^4$   $\mu\text{m}^2$  on average). At day 30 after shell  
274 damage, the number of prisms was 21.5 in  $10^4$   $\mu\text{m}^2$  similar to the normal ones, indicating the  
275 nucleation rate of  $\text{CaCO}_3$  fell down to basal line (Figure 4e). This was further confirmed by the  
276 SEM result (Figure 4c). However, the periostracum at day 30 after shell damage was thicker  
277 than the control, and abundant organic materials filled between the prism columns. Moreover,  
278 the diameters of the prisms were dispersed, indicating the asynchrony of the nucleation events.  
279 These results showed that the shell repair process is an emergency response with accelerated  
280 mineralization.

281

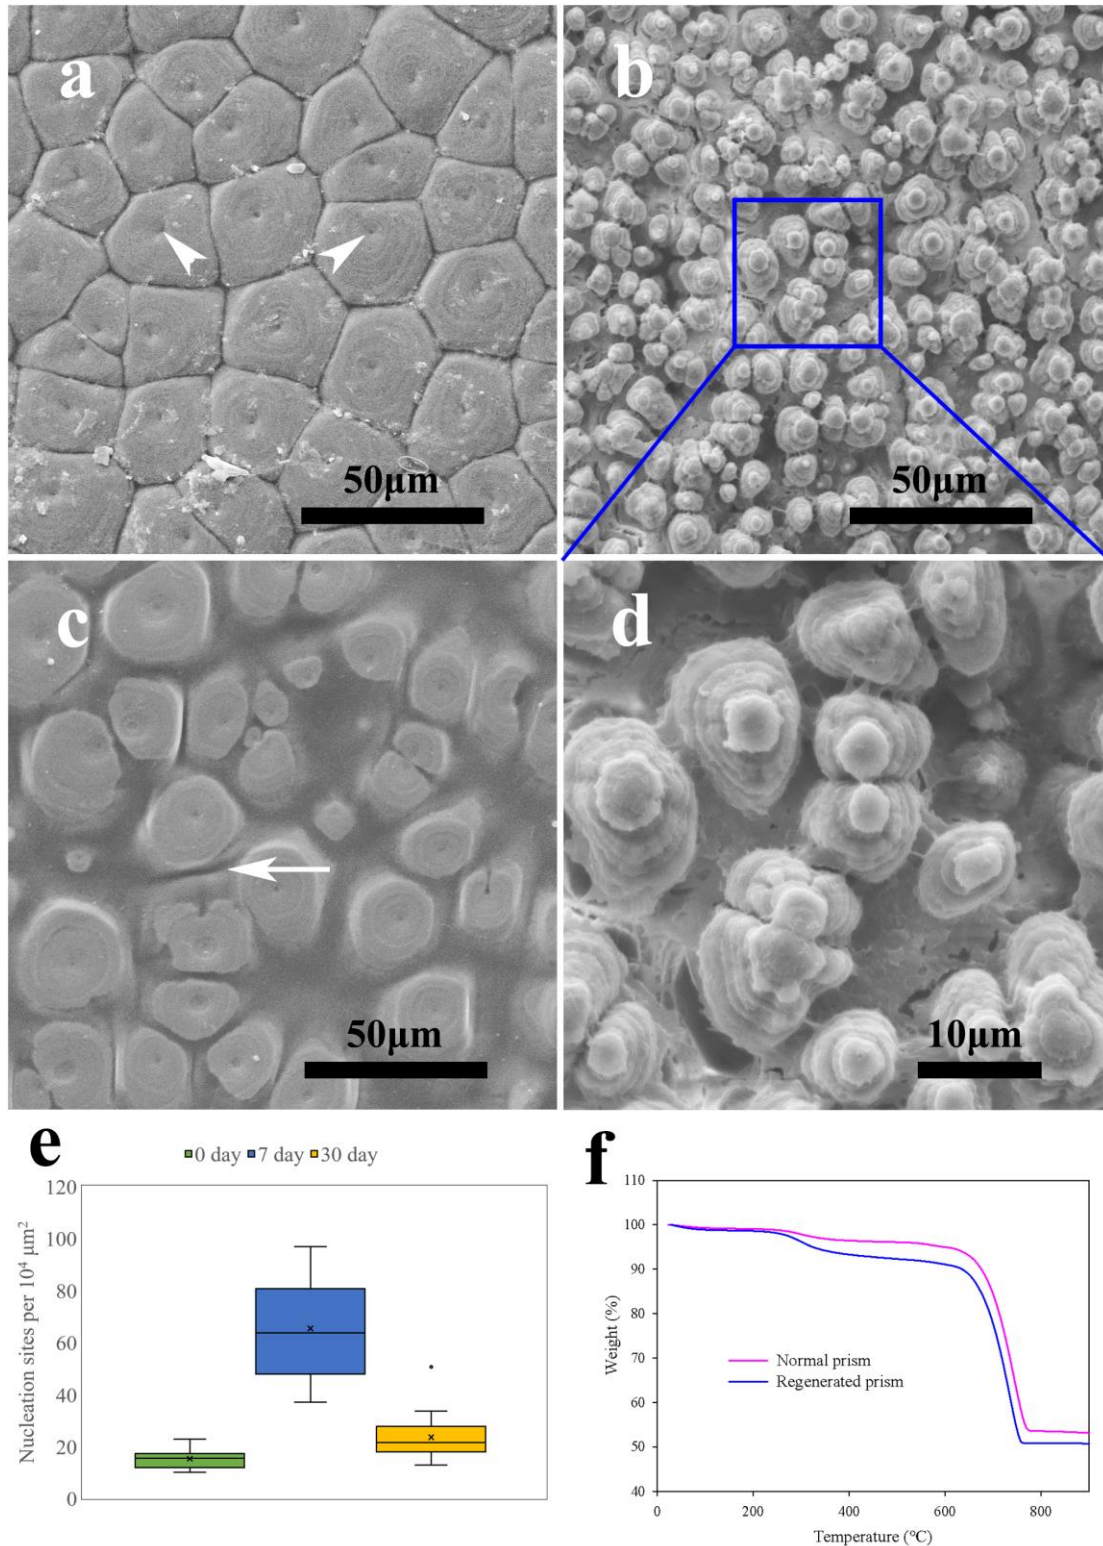

282

283 Figure 4. a-d, SEM images of the outer surface of the prismatic layers, representing the  
284 nucleation events of  $\text{CaCO}_3$ . a, normal prismatic layer with regular polygons. White arrow  
285 heads indicate the nucleation sites within each prism. b and d, outer surface of a regenerated  
286 prismatic layer at day 7 with the periostracum layer peeled off. d is the magnification of b. Note  
287 that the initial small prisms are in tower shape. c, outer surface of a regenerated prismatic layer  
288 at day 30. The white arrow indicates the organic material between the prisms. e, quantitative

289 analysis of the initial nucleation events of prismatic layer during the shell regeneration process  
290 (n=6; in each shell sample, 2-3 areas were examined). f, TGA analysis of normal and  
291 regenerated prismatic layers (30 days after shell damage).

292

293 The prismatic layers in bivalve shells contain high content of organic compounds which play  
294 vital roles in the shell formation. We found that organic materials in the prism of *P. fucata* was  
295 about 4.05% of the bulk weight, consistent with those of other bivalves (2.7-6.1%) (Checa et  
296 al., 2005). The organic materials include matrix proteins, polysaccharides, lipids and other  
297 small molecules. And the matrix proteins are proved to be involved in calcium carbonate  
298 nucleation, polymorphs selection, crystal orientation, and have been extensively studied (Liang  
299 et al., 2015; Miyamoto et al., 1996; Ponce and Evans, 2011; Takeuchi et al., 2008). It has been  
300 demonstrated that many matrix protein genes were upregulated after shell damage stimulation  
301 (Kong et al., 2009; Lin et al., 2014) and some SMPs have been proved to promote nucleation  
302 of calcium carbonate, such as Pfy2 (Yan et al., 2017), Alv (Kong et al., 2018) and Prismaticin-  
303 14 (Suzuki et al., 2004). Therefore, we speculate that the mantle tissue promotes the nucleation  
304 of calcium carbonate by secreting more organic matrix, thus accelerating the shell regeneration  
305 process. Indeed, we found that the regenerated prism contained more organic materials than  
306 normal prism layer (Figure 4f). The weight losses between 230°C and 600°C were due to the  
307 thermolysis of the organic matter, and the release of CO<sub>2</sub> from the decomposition of CaCO<sub>3</sub>  
308 after 600°C led to further dramatic weight losses (Li et al., 2017). The content of the shell  
309 matrix in the regenerated prismatic layers was calculated to be about 7.46% weight of the total  
310 mass, probably the highest matrix content in biominerals.

### 311 3.3 Direct control of the mantle tissue on the shell repair process

312 Mantle tissue plays a central role in the shell formation. To understand how the mantle  
313 conducts the shell regeneration, special mantle-shell samples were prepared (Figure 5a and 5e).  
314 The anesthesia treatment before fixation resulted in the well preserved morphology of the  
315 tissues close to their physiological state. It was found that the mantle was in direct charge of  
316 the regeneration process. Right at the injury site, the mantle retracted to the nacre region (Figure  
317 1a). In this manner, the ventral part of the nacre was covered by the mantle edge and  
318 submarginal zone which secreted a regenerated prismatic layer upon the former (Figure 5a-5d).  
319 It follows that the displacement does not alter the secretary repertoires of the mantle edge and  
320 submarginal zone (see the following section). As the growing tip of the shell was propelled  
321 forwards, the mantle gradually repositioned. As a result, the RPL upon the previous nacre would  
322 be covered by the homing pallial zone of the mantle, and the latter would deposit layers of  
323 regenerated nacre upon the RPL (Figure 3j).

324 As shown in Figure 5, the morphology of the regenerated shells and the behavior of the  
325 mantle were closed related. Right at the notching site, the area between the cut edge of shell  
326 notching (Figure 5b) and inner-most of the RPL (Figure 5d), was measured about  $1.91 \pm 0.03$   
327 mm in length, corresponding to the retracted mantle edge and submarginal zone at the very  
328 beginning of the shell regeneration process. This length is less than a half of that between the  
329 regenerated shell edge and the frontier of the regenerated nacre (Figure 5c), corresponding to  
330 the growing prismatic layer, was about  $4.09 \pm 0.15$  mm. Therefore, the shell damage not only  
331 caused the retraction of the mantle tissue, but also led to the contraction of the mantle edge and  
332 the submarginal zone at the injury site, which affecting the shell morphology in return. However,

333 in the adjacent area parallel to the notching site, the length of the growing prism before shell  
334 damage ( $4.51 \pm 0.04$  mm) and RPL right at the beginning of shell repair ( $4.36 \pm 0.06$  mm) were  
335 comparable, indicating slightly contraction of the mantle tissue. Interestingly, on the adjacent  
336 inner shell surface, parallel to the nick, accumulation of periostracum was observed (Figure 5f),  
337 indicating that the shell damage led to a stationary state of the mantle tissue and the mantle  
338 edge kept secreting periostracum without precise control.

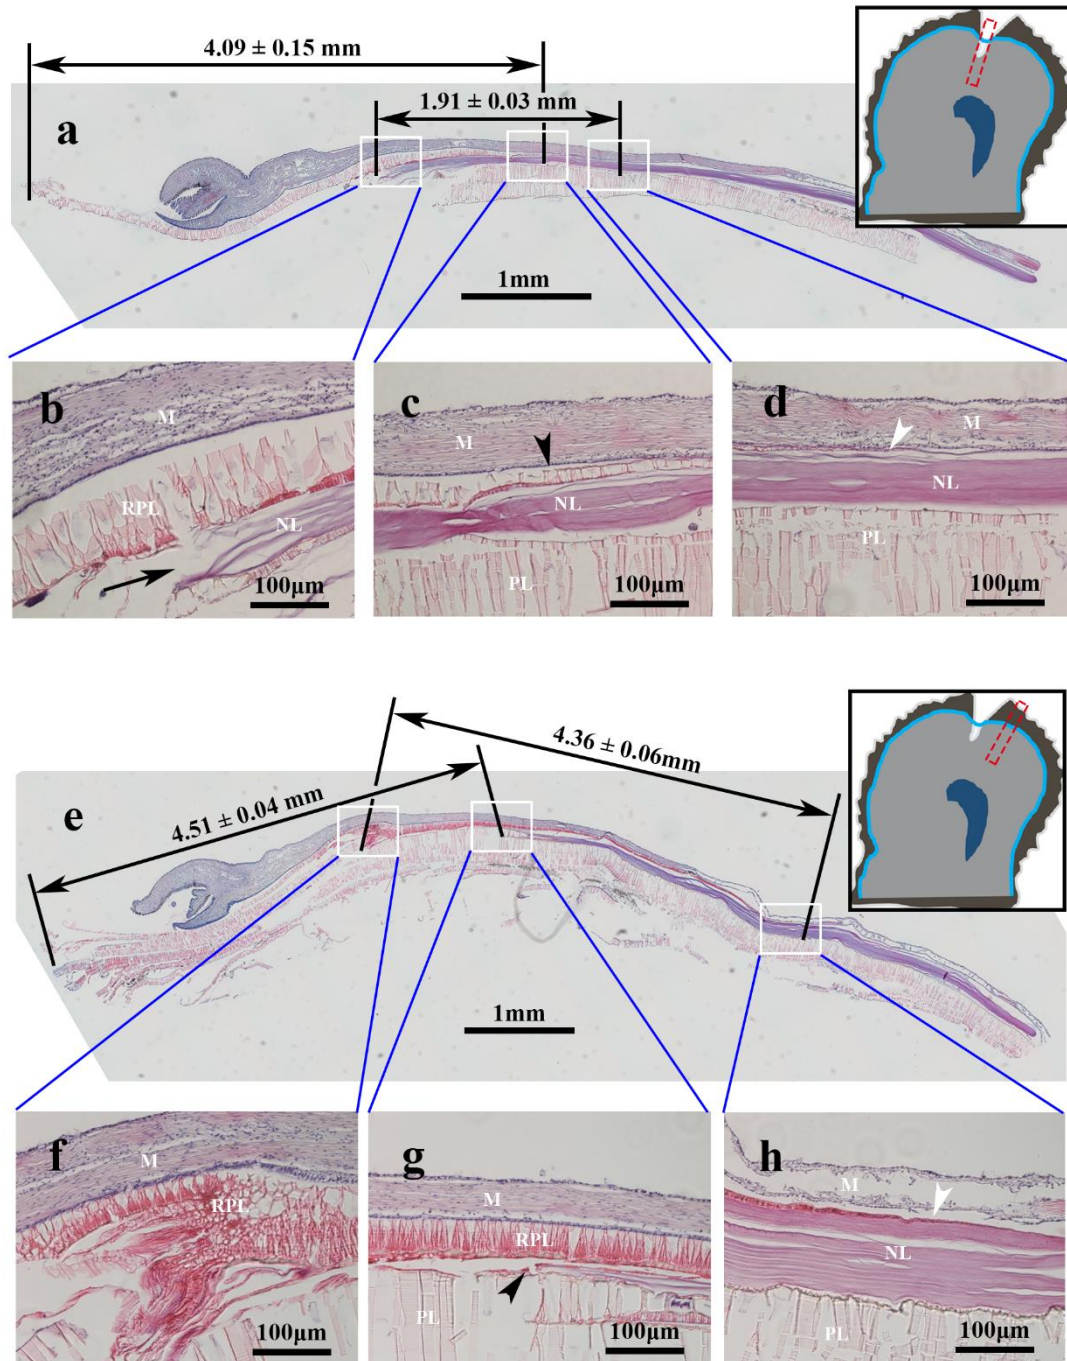

339

340 Figure 5. H&E stain of the mantle-shell samples at 60 days after shell damage. a, decalcified  
341 shell sample with the mantle tissue covering the notching site, as indicated by the inset at the  
342 top right corner. b-d, the magnification of the white frames in a, showing the cut edge (black  
343 arrow), forming prism/nacre transition zone (black arrow head) and the starting position of the

344 regenerated prismatic layer (white arrow head). e, decalcified shell sample with the covering  
345 mantle tissue, taken from the adjacent region paralleled to the notching site (as indicated by the  
346 inset on the right). f-h, the magnification of the white frames in e, showing the retraction line  
347 of the mantle edge, previous prism/nacre transition zone (black arrow head) and the starting  
348 position of the regenerated prismatic layer (white arrow head). Note that the corresponding  
349 lengths were measured along the silhouette of the shells.

350

351 Shell matrix proteins (SMPs) fulfill vital roles in CaCO<sub>3</sub> nucleation, orientation, and crystal  
352 polymorph selection (Miyamoto et al., 1996; Ponce and Evans, 2011; Sudo et al., 1997;  
353 Takeuchi et al., 2008). And the biomineralization processes of the prism and nacre are  
354 controlled by the different SMPs secretary repertoires of the different mantle zones (Marie et  
355 al., 2012). Several identified SMPs have been showed to be significantly upregulated after shell  
356 notching treatment (Fang et al., 2012; Pan et al., 2014). However, in these studies, the gene  
357 expressions were detected in the whole mantle tissue, therefore, it remains unclear whether the  
358 SMPs expressions in each mantle zone are precisely controlled. We separately detected the  
359 secretary regimes in the mantle edge and the pallial zone, corresponding to the prismatic layer  
360 and nacreous layer secretion, respectively. The results showed that post shell notching treatment,  
361 the prism SMPs, namely KRMP, Prismaticin-14 and Prismaticin-39 were significantly upregulated  
362 in the mantle edge (Figure 6a), while the nacre SMPs, namely Pif80, N16 and MSI60 were  
363 significantly upregulated in the pallial zone (Figure 6b). Nacrein is present in both prism and  
364 nacre, and its expression was upregulated in both the mantle edge and the pallial zone (Figure  
365 6a and 6b). Interestingly, neither prism SMPs were detected in the pallial zone, nor the nacre  
366 proteins in the mantle edge during the shell repair process (data not shown). Therefore, the shell  
367 damage stimulated the SMPs upregulation in the corresponding mantle zones, but did not  
368 change the functional secretary regimes. In a recent study, Anne K. Hüning et al. (Hüning et al.,  
369 2016a) showed that several genes that are specifically expressed in pallial and marginal zones  
370 could be induced in central mantle after experimental injury in the central part of the shell. The  
371 shell morphology during the flat pearl formation in the abalone *Heliotis rufescens* (Fritz et al.,  
372 1994) and pearl oyster *P. fucata* (Xiang et al., 2013) also suggested that the secretary regime of  
373 central part of the mantle tissue are programmable. Such inconsistency may due to the different  
374 approaches to induce shell damage, which result in varied shell repair strategies of the molluscs.  
375 When shell damage occurred in the central part of the shell, no retraction of the mantle tissues  
376 was observed, and the shell repair was accomplished by the central mantle, which might force  
377 the central mantle to reprogram the secretary regime to fulfill the deposition of outer shell layers  
378 (Fritz et al., 1994). However, in our study, the damage was occurred at the edge of the shell and  
379 forced the mantle to retract. Although the mantle edge might sense the unusual signal of the  
380 nacre surface, its secretary regime remained unchanged. As a result, the mantle edge deposited  
381 a regenerated prismatic layer on the underlying nacre and determine the re-initiation of the shell  
382 formation process.

383

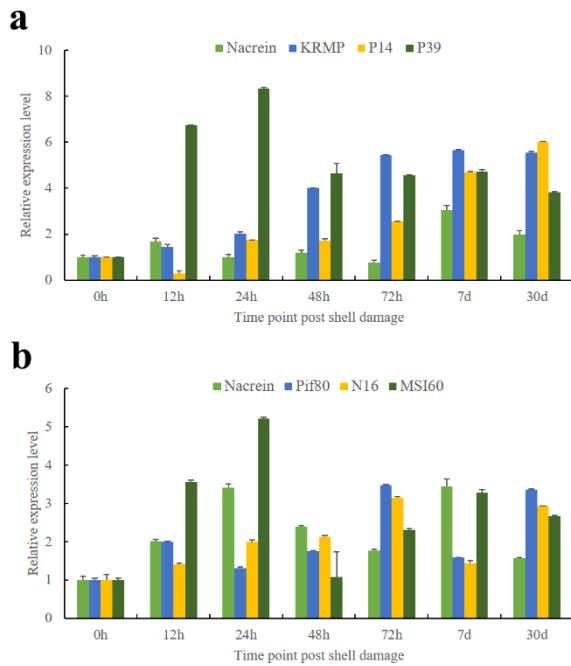

384

385 Figure 6. Gene expression of the shell matrix proteins in the mantle edge (a) and pallial zone  
386 (b) post artificial shell damage. h, hour; d, day. P14, Prismaticin-14; P39, Prismaticin-39.

387

#### 388 4. Conclusion

389 Shell formation of the pearl oyster *P. fucata* is mainly controlled by the mantle tissue. During  
390 the shell regeneration process, the shell damage, either artificial in the present study or natural  
391 in the open seawater, will cause the mantle tissue to retract and accelerate the secretion of SMPs.  
392 The retracted mantle tissue deposited an unusual prismatic layer upon the mature nacre sheet,  
393 and the upregulated SMPs promoted the  $\text{CaCO}_3$  nucleation. In this way the shell was quickly  
394 repaired, preventing secondly injury such as bacterial infection. However, how the physical  
395 signal of the shell damage is transferred to the mantle epithelial cells remains to be elucidated.  
396 Further study into the signal transduction pathway will shed light on the molecular mechanism  
397 underlying the precise regulation in the shell regeneration and eventually the shell  
398 mineralization in bivalves.

399

#### 400 Acknowledgements:

401 This work was supported by National Natural Science Foundation of China Grants 31572594  
402 and 31872543.

#### 403 Authors' contributions

404 Jingliang Huang carried out the lab work, participated in data analysis, contributed to the design  
405 of the study and drafted the manuscript. Yangjia Liu and Taifeng Jiang coordinated the study.  
406 Wentao Dong and Guilan Zheng assisted in the data analysis. Liping Xie and Rongqing Zhang  
407 provided financial supports and revised the manuscript. All authors gave final approval for  
408 publication.

#### 409 Competing interests

410 The authors declare no competing financial interests.

#### 411 Ethics statement

412 We confirm that the present study was approved by the Animal Ethics Committee of Tsinghua  
413 University, Beijing, China. All experiments were performed in accordance with relevant  
414 guidelines and regulations.

415

#### 416 Reference

417 Checa, A.G., Rodriguez-Navarro, A.B., Delgado, F.J.E., and Esteban-Delgado, F.J. (2005). The nature  
418 and formation of calcitic columnar prismatic shell layers in pteriomorphian bivalves. *Biomaterials* 26,  
419 6404-6414.

420 Chen, P.Y., Lin, A.Y.M., McKittrick, J., and Meyers, M.A. (2008). Structure and mechanical properties  
421 of crab exoskeletons. *Acta Biomater* 4, 587-596.

422 Chen, Y., Liu, C., Li, S., Liu, Z., Xie, L., and Zhang, R. (2019). Repaired Shells of the Pearl Oyster  
423 Largely Recapitulate Normal Prismatic Layer Growth: A Proteomics Study of Shell Matrix Proteins.  
424 *ACS Biomaterials Science & Engineering* 5, 519-529.

425 Fang, D., Pan, C., Lin, H.J., Lin, Y., Zhang, G.Y., Wang, H.Z., He, M.X., Xie, L.P., and Zhang, R.Q.  
426 (2012). Novel Basic Protein, PFn23, Functions as Key Macromolecule during Nacre Formation. *Journal*  
427 *of Biological Chemistry* 287, 15776-15785.

428 Fang, Z., Feng, Q.L., Chi, Y.Z., Xie, L.P., and Zhang, R.Q. (2008). Investigation of cell proliferation and  
429 differentiation in the mantle of *Pinctada fucata* (Bivalve, Mollusca). *Marine Biology* 153, 745-754.

430 Finnemore, A., Cunha, P., Shean, T., Vignolini, S., Guldin, S., Oyen, M., and Steiner, U. (2012).  
431 Biomimetic layer-by-layer assembly of artificial nacre. *Nature Communications* 3.

432 Fleury, C., Marin, F., Marie, B., Luquet, G., Thomas, J., Josse, C., Serpentine, A., and Lebel, J.M. (2008).  
433 Shell repair process in the green ormer *Haliotis tuberculata*: A histological and microstructural study.  
434 *Tissue Cell* 40, 207-218.

435 Fritz, M., Belcher, A.M., Radmacher, M., Walters, D.A., Hansma, P.K., Stucky, G.D., Morse, D.E., and  
436 Mann, S. (1994). Flat Pearls from Biofabrication of Organized Composites on Inorganic Substrates.  
437 *Nature* 371, 49-51.

438 Huang, J.L., Li, S.G., Liu, Y.J., Liu, C., Xie, L.P., and Zhang, R.Q. (2018). Hemocytes in the extrapallial  
439 space of *Pinctada fucata* are involved in immunity and biomineralization. *Sci Rep-Uk* 8.

440 Huning, A.K., Lange, S.M., Ramesh, K., Jacob, D.E., Jackson, D.J., Panknin, U., Gutowska, M.A.,  
441 Philipp, E.E., Rosenstiel, P., Lucassen, M., *et al.* (2016a). A shell regeneration assay to identify  
442 biomineralization candidate genes in mytilid mussels. *Mar Genomics* 27, 57-67.

443 Huning, A.K., Lange, S.M., Ramesh, K., Jacob, D.E., Jackson, D.J., Panknin, U., Gutowska, M.A.,  
444 Philipp, E.E.R., Rosenstiel, P., Lucassen, M., *et al.* (2016b). A shell regeneration assay to identify  
445 biomineralization candidate genes in mytilid mussels. *Mar Genom* 27, 57-67.

446 Jackson, A.P., Vincent, J.F.V., and Turner, R.M. (1988). The Mechanical Design of Nacre. *Proc R Soc*  
447 *Ser B-Bio* 234, 415-+.

448 Kong, J.J., Liu, C., Yang, D., Yan, Y., Chen, Y., Huang, J.L., Liu, Y.J., Zheng, G.L., Xie, L.P., and Zhang,  
449 R.Q. (2018). Alv Protein Plays Opposite Roles in the Transition of Amorphous Calcium Carbonate to  
450 Calcite and Aragonite during Shell Formation. *Crystal Growth & Design* 18, 3794-3804.

451 Kong, Y.W., Jing, G., Yan, Z.G., Li, C.Z., Gong, N.P., Zhu, F.J., Li, D.X., Zhang, Y.R., Zheng, G.L.,  
452 Wang, H.Z., *et al.* (2009). Cloning and Characterization of Prsilkin-39, a Novel Matrix Protein Serving  
453 a Dual Role in the Prismatic Layer Formation from the Oyster *Pinctada fucata*. *Journal of Biological*  
454 *Chemistry* 284, 10841-10854.

455 Li, X.G., Lv, Y., Ma, B.G., Wang, W.Q., and Jian, S.W. (2017). Decomposition kinetic characteristics of

- 456 calcium carbonate containing organic acids by TGA. *Arab J Chem* *10*, S2534-S2538.
- 457 Liang, J., Xu, G., Xie, J., Lee, I., Xiang, L., Wang, H., Zhang, G., Xie, L., and Zhang, R. (2015). Dual  
458 Roles of the Lysine-Rich Matrix Protein (KRMP)-3 in Shell Formation of Pearl Oyster, *Pinctada fucata*.  
459 *PLoS One* *10*, e0131868.
- 460 Lin, Y., Jia, G.C., Xu, G.R., Su, J.T., Xie, L.P., Hu, X.L., and Zhang, R.Q. (2014). Cloning and  
461 characterization of the shell matrix protein Shematin in scallop *Chlamys farreri*. *Acta Biochimica Et*  
462 *Biophysica Sinica* *46*, 709-719.
- 463 Mann, S., Perry, C.C., Webb, J., Luke, B., and Williams, R.J.P. (1986). Structure, Morphology,  
464 Composition and Organization of Biogenic Minerals in Limpet Teeth. *Proc R Soc Ser B-Bio* *227*, 179-  
465 190.
- 466 Marie, B., Joubert, C., Tayale, A., Zanella-Cleon, I., Belliard, C., Piquemal, D., Cochenne-Laureau, N.,  
467 Marin, F., Gueguen, Y., and Montagnani, C. (2012). Different secretory repertoires control the  
468 biomineralization processes of prism and nacre deposition of the pearl oyster shell. *Proc Natl Acad Sci*  
469 *U S A* *109*, 20986-20991.
- 470 Meenakshi, V.R., Martin, A.W., and Wilbur, K.M. (1974). Shell Repair in *Nautilus-Macromphalus*.  
471 *Marine Biology* *27*, 27-35.
- 472 Melzner, F., Stange, P., Trubenbach, K., Thomsen, J., Casties, I., Panknin, U., Gorb, S.N., and Gutowska,  
473 M.A. (2011). Food Supply and Seawater pCO<sub>2</sub> Impact Calcification and Internal Shell Dissolution in  
474 the Blue Mussel *Mytilus edulis*. *PLoS One* *6*.
- 475 Miyamoto, H., Miyashita, T., Okushima, M., Nakano, S., Morita, T., and Matsushiro, A. (1996). A  
476 carbonic anhydrase from the nacreous layer in oyster pearls. *Proc Natl Acad Sci U S A* *93*, 9657-9660.
- 477 Pan, C., Fang, D., Xu, G., Liang, J., Zhang, G., Wang, H., Xie, L., and Zhang, R. (2014). A novel acidic  
478 matrix protein, Pfn44, stabilizes magnesium calcite to inhibit the crystallization of aragonite. *J Biol*  
479 *Chem* *289*, 2776-2787.
- 480 Pan, C.M., and Watabe, N. (1989). Periostracum Formation and Shell Regeneration in the Lingulid  
481 *Glottidia-Pyramidata* (Brachiopoda, Inarticulata). *T Am Microsc Soc* *108*, 283-298.
- 482 Ponce, C.B., and Evans, J.S. (2011). Polymorph Crystal Selection by n16, an Intrinsically Disordered  
483 Nacre Framework Protein. *Crystal Growth & Design* *11*, 4690-4696.
- 484 Raabe, D., Sachs, C., and Romano, P. (2005). The crustacean exoskeleton as an example of a structurally  
485 and mechanically graded biological nanocomposite material. *Acta Mater* *53*, 4281-4292.
- 486 Seto, J., Ma, Y.R., Davis, S.A., Meldrum, F., Gourrier, A., Kim, Y.Y., Schilde, U., Sztucki, M.,  
487 Burghammer, M., Maltsev, S., *et al.* (2012). Structure-property relationships of a biological mesocrystal  
488 in the adult sea urchin spine. *Proc Natl Acad Sci U S A* *109*, 3699-3704.
- 489 Silverman, H., Steffens, W.L., and Dietz, T.H. (1983). Calcium Concretions in the Gills of a Fresh-Water  
490 Mussel Serve as a Calcium Reservoir during Periods of Hypoxia. *J Exp Zool* *227*, 177-189.
- 491 Song, F., Soh, A.K., and Bai, Y.L. (2003). Structural and mechanical properties of the organic matrix  
492 layers of nacre. *Biomaterials* *24*, 3623-3631.
- 493 Sudo, S., Fujikawa, T., Nagakura, T., Ohkubo, T., Sakaguchi, K., Tanaka, M., Nakashima, K., and  
494 Takahashi, T. (1997). Structures of mollusc shell framework proteins. *Nature* *387*, 563-564.
- 495 Suzuki, M., Murayama, E., Inoue, H., Ozaki, N., Tohse, H., Kogure, T., and Nagasawa, H. (2004).  
496 Characterization of Prismalin-14, a novel matrix protein from the prismatic layer of the Japanese pearl  
497 oyster (*Pinctada fucata*). *Biochem J* *382*, 205-213.
- 498 Suzuki, M., Nakayama, S., Nagasawa, H., & Kogure, T. (2013). Initial formation of calcite crystals in  
499 the thin prismatic layer with the periostracum of *Pinctada fucata*. *Micron* *45*, 136-139.



500 Takeuchi, T., Sarashina, I., Iijima, M., and Endo, K. (2008). In vitro regulation of CaCO<sub>3</sub> crystal  
501 polymorphism by the highly acidic molluscan shell protein Aspein. *FEBS Lett* 582, 591-596.  
502 Ubukata, T. (2001). Nucleation and growth of crystals and formation of cellular pattern of prismatic shell  
503 microstructure in bivalve molluscs. *FORMA-TOKYO* 16, 141-154.  
504 V. R. Meenakshi, P.L.B.a.K.M.W. (1973). An ultrastructural study of shell regeneration in *Mytilus edulis*  
505 (Mollusca: Bivalvia). *Journal of Zoology Volume171*, 475-484.  
506 Xiang, L., Su, J.T., Zheng, G.L., Liang, J., Zhang, G.Y., Wang, H.Z., Xie, L.P., and Zhang, R.Q. (2013).  
507 Patterns of Expression in the Matrix Proteins Responsible for Nucleation and Growth of Aragonite  
508 Crystals in Flat Pearls of *Pinctada fucata*. *PLoS One* 8.  
509 Yan, Y., Yang, D., Yang, X., Liu, C., Xie, J., Zheng, G., Xie, L., and Zhang, R. (2017). A Novel Matrix  
510 Protein, PfY2, Functions as a Crucial Macromolecule during Shell Formation. *Sci Rep* 7, 6021.  
511 Zhang, C., and Zhang, R.Q. (2006). Matrix proteins in the outer shells of molluscs. *Marine Biotechnology*  
512 8, 572-586.  
513
